# Supplementary material for: Gene expression profiling of hematologic malignant cell lines resistant to oncolytic virus treatment
Source: PubMed Central journal article supplement (PMC5352049; doi:10.18632/oncotarget.13598), 2016-11-25
Supplement: oncotarget-08-1213-s001.pdf [file oncotarget-08-1213-s001.pdf]

# Gene expression profiling of hematologic malignant cell lines resistant to oncolytic virus treatment

## SUPPLEMENTARY FIGURES

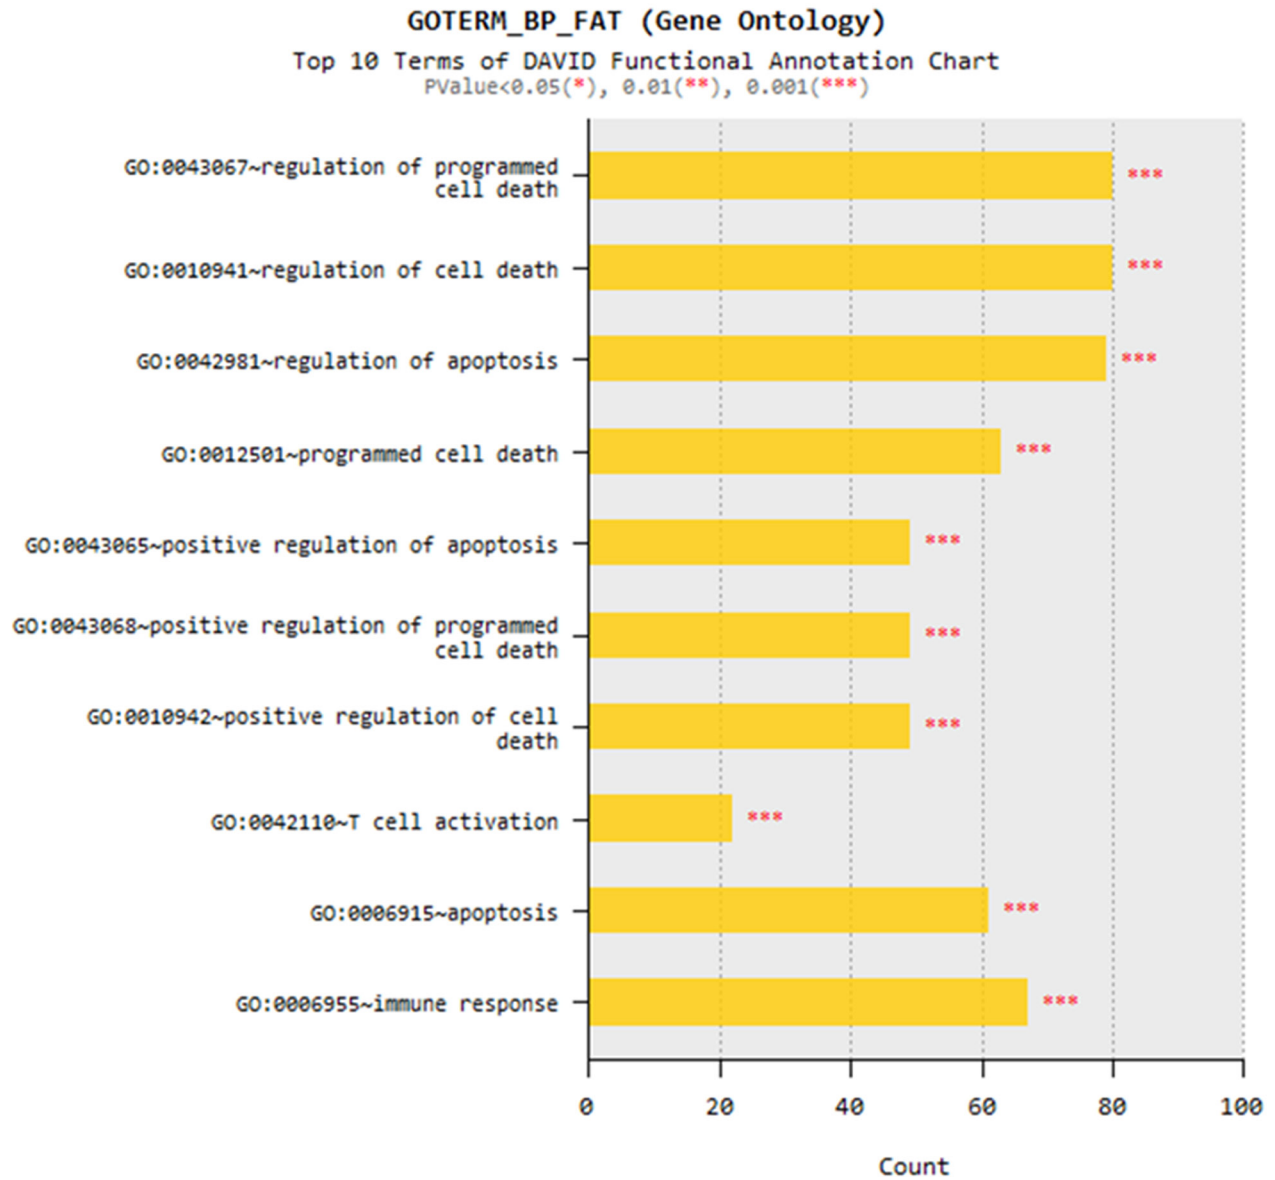

Supplementary Figure S1: Genes related to biologic process were grouped into functional categories according to DAVID annotation chart.

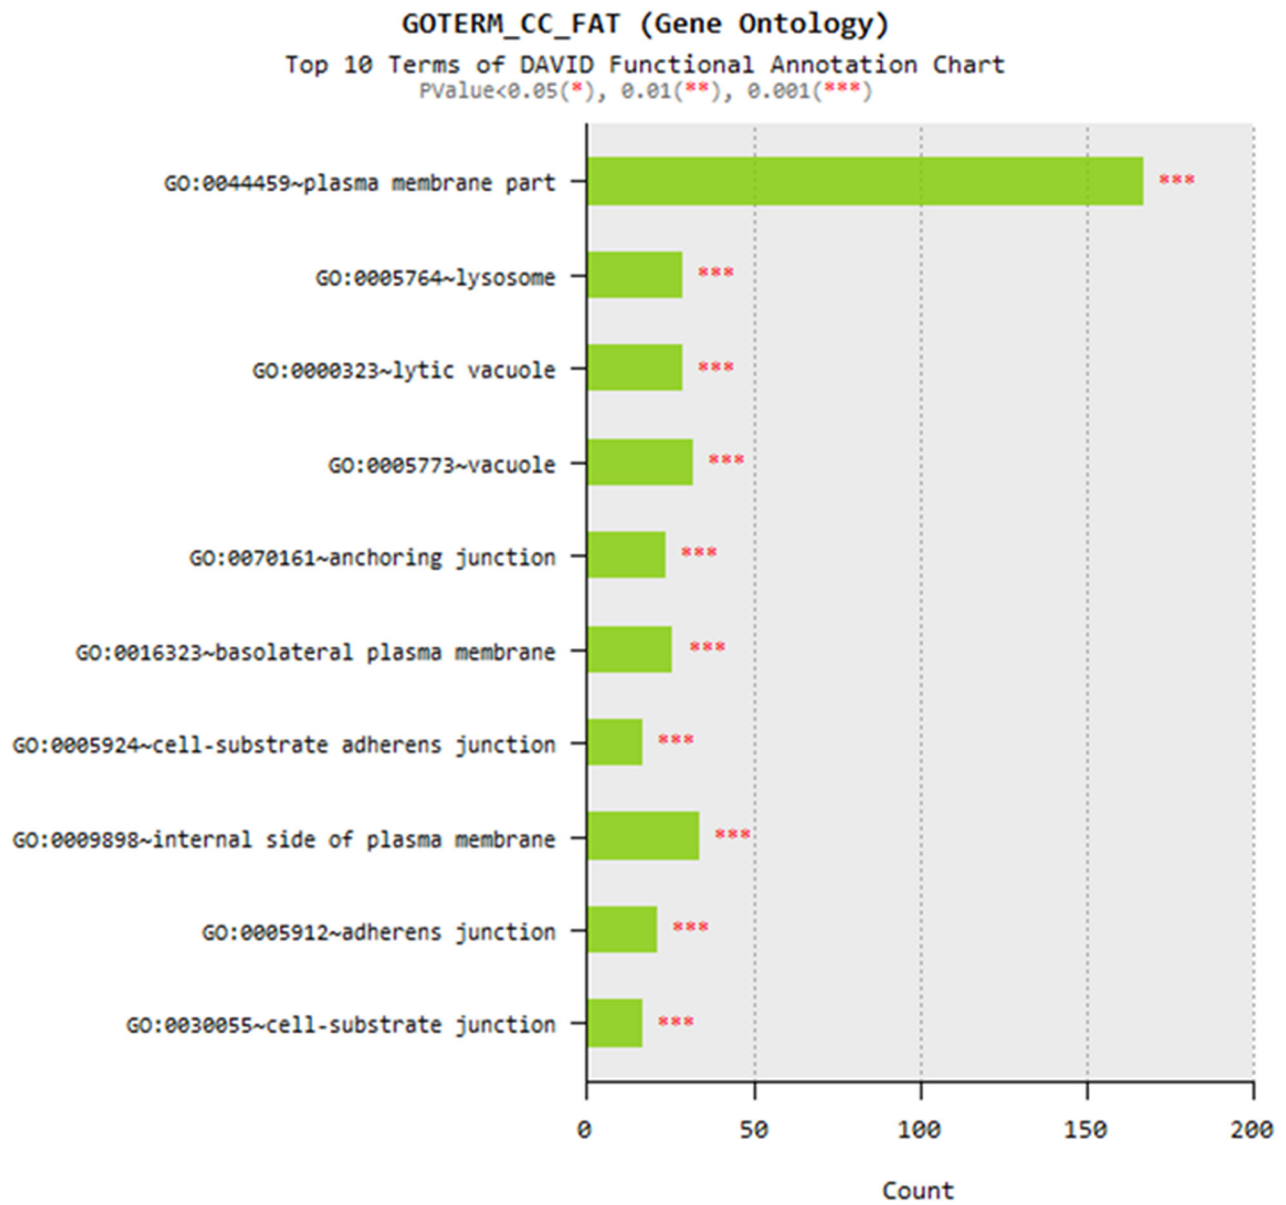

Supplementary Figure S2: Genes related to cellular component were grouped into functional categories according to DAVID annotation chart.

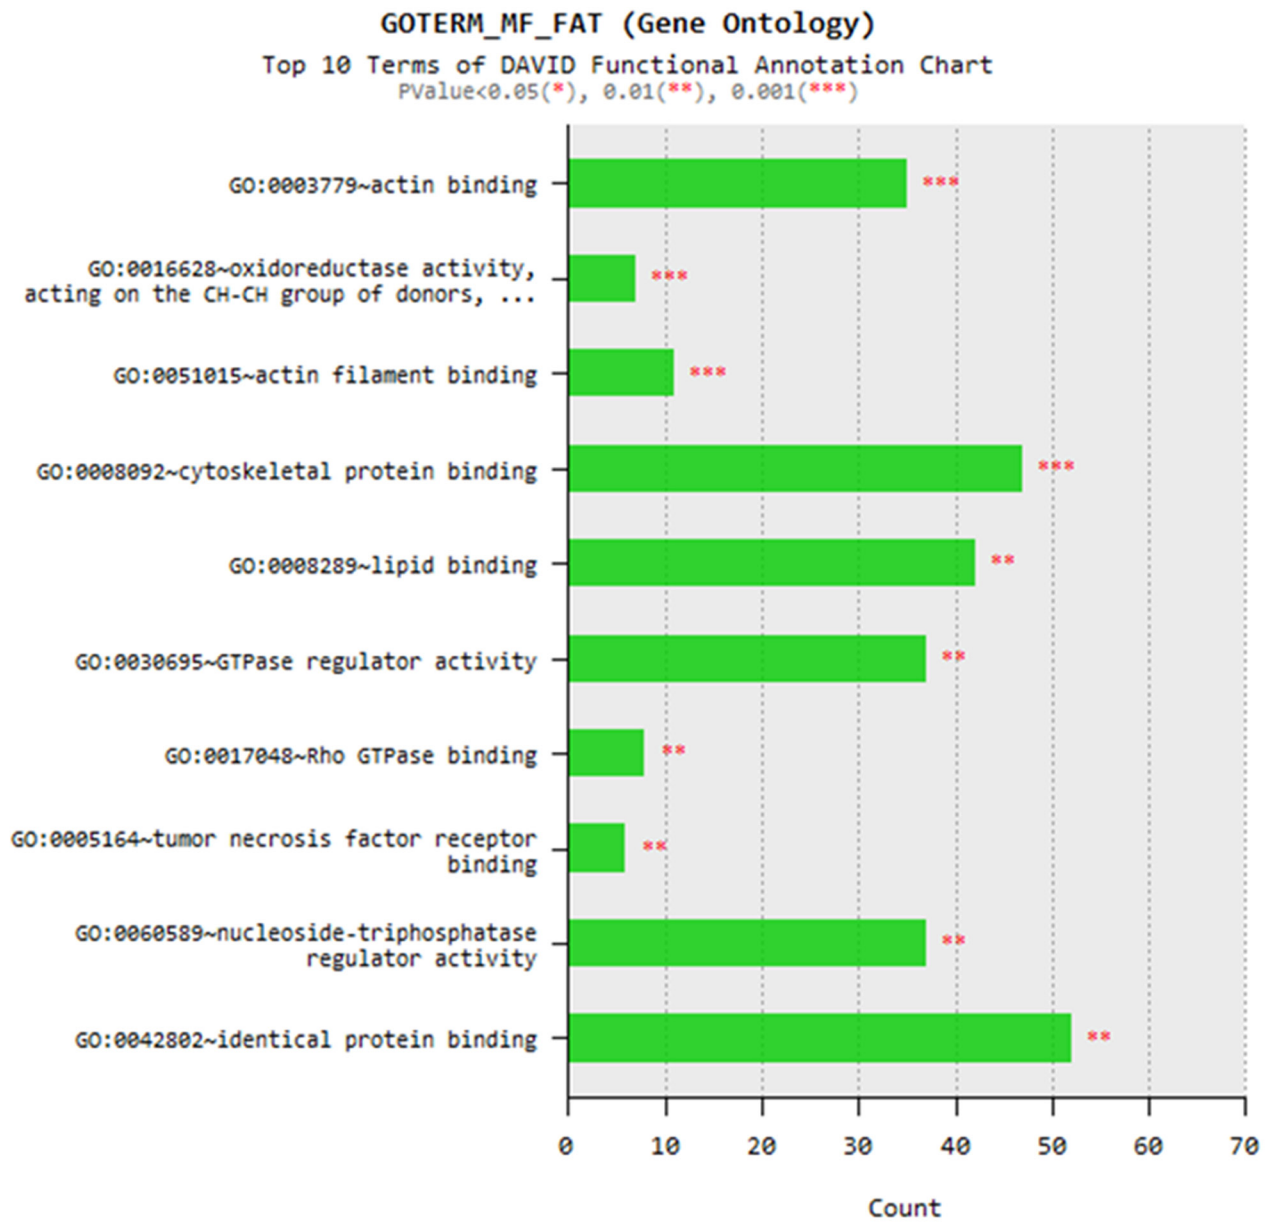

Supplementary Figure S3: Genes related to molecular function were grouped into functional categories according to DAVID annotation chart.
